# Supplementary material for: A novel method of shortening the pathway between surface reactive oxygen species and organic receptors under surface lattice metal atom substitution over HZSM-5 for intensifying catalytic oxidation CH2Cl2
Source: Royal Society of Chemistry journal article supplement (doi:10.1039/d5ra06126a), 2026-02-26
Supplement: d5ra06126a1.pdf [file d5ra06126a1.pdf]

## *Supplementary Information*

**A novel method of shortening the pathway between  
surface reactive oxygen species and organic receptors under  
surface lattice metal atom substitution over HZSM-5SM-5  
for intensifying catalytic oxidation CH<sub>2</sub>Cl<sub>2</sub>**

Jian Li <sup>a,\*</sup>, Mengjie Zhao <sup>a,b</sup>, Ziyi Song <sup>a,b</sup>, Yingjie Shi <sup>a</sup>, Tianshan Xue <sup>a,\*</sup>, Jiayu Huang <sup>a</sup>,  
Hongchang Wang <sup>a</sup>, Jinwei Zhu <sup>a</sup>, Yutao Cui <sup>a</sup>, Yuling Tan <sup>a</sup>

<sup>a</sup> *State Key Laboratory of Environmental Criteria and Risk Assessment, Chinese Research  
Academy of Environmental Sciences, Beijing 100012, China*

<sup>b</sup> *School of Chemical and Environmental Engineering, China University of Mining and  
Technology (Beijing), Beijing 100083, China*

---

\* Corresponding authors.

*E-mail address:* [1059151202@qq.com](mailto:1059151202@qq.com) (Jian Li), [Tel:15028692572](tel:15028692572).

*E-mail address:* [xue.tianshan@craes.org.cn](mailto:xue.tianshan@craes.org.cn) (Tianshan Xue), [Tel:15201444184](tel:15201444184).

## (1) Chemicals

$\text{Cu}(\text{NO}_3)_2 \cdot 3\text{H}_2\text{O}$  (99.99 wt.%),  $\text{Co}(\text{NO}_3)_2 \cdot 6\text{H}_2\text{O}$  (99.99 wt.%),  $\text{KMnO}_4$  (99.5 wt.%),  $\text{K}_2\text{Cr}_2\text{O}_7$  (99.5 wt.%) were obtained from Sigma-Aldrich (America). Tetrapropylammonium hydroxide (TPAOH, 25 wt.%) was provided by Weng Jiang Chemical Testing Co., Ltd (Guangzhou, China).  $\text{NaOH}$  ( $\geq 96$  wt.%),  $\text{Mn}(\text{NO}_3)_2$  (50 wt. %) were provided by Zhanyun Chemical Co., Ltd (Shanghai, China).

## (2) Catalyst characterization

The amounts of metal atoms were obtained by ICP-OES using a Agilent ICPOES730 analyzer.

X-ray powder diffraction (XRD) patterns were obtained from a D8 ADVANCE powder X-ray diffractometer system (BRUKER, Germany) with nickel-filtered Cu-K $\alpha$  radiation (40 kV and 40 mA).

The surface morphology of the prepared catalyst was observed by scanning electron microscopy (SEM) using a HITACHI SU8020 microscope (HITACHI, Japan) and the elemental composition was obtained by Energy Dispersive Spectrometer (EDS) mapping.

Transmission electron microscopic (TEM) were conducted using a JEM 1200EX electron microscope (JEOL, Japan) operating at 120 kV.

$\text{N}_2$  physical adsorption-desorption isotherms were recorded at 77 K using a Micromeritics ASAP 2460 analyzer (Micromeritics, USA). The total surface area was estimated from the BET method. The external surface area, micropore surface area and micropore volume were estimated by the t-plot method. The mesopore volume was obtained by the total pore volume minus the micropore volume. The total volume was derived at  $P/P_0 = 0.99$ .

The  $^{29}\text{Si}$  MAS-NMR spectra of the powdered samples were recorded at room temperature on a Bruker AVANCEIIIHD 500MHZSM-5 NMR spectrometer. The spectrometer frequency was 130.33 MHzSM-5, and aluminium chloride was used as an external reference material

Ultraviolet visible diffuse reflectance (DRS UV-Vis) spectra were recorded by a HIMadZU-1601PC spectrometer, with a scanning range of 200-800 nm and a barium sulfate support.

Fourier transform infrared spectroscopy (FTIR) spectra were recorded by a Nicolet IS10 spectrometer with the resolution of  $4\text{cm}^{-1}$  in the range of  $400\text{-}4000\text{ cm}^{-1}$ .

The Pyridine-IR (Py-IR) signals were collected through a Thermo Nicolet 380 analyzer in the range of  $400\text{-}4000\text{ cm}^{-1}$ .

X-ray photoelectron spectroscopy (XPS) analyses were provided by a Thermo Scientific Escalab 250Xi X-ray photoelectron spectrometer (Micromeritics, USA) with Al K $\alpha$  radiation as an exciting X-ray source.

The amount and strength of the acid sites on the catalyst surface were obtained by temperature-programmed desorption (TPD) of ammonia on a Micromeritics Auto Chem II 2920 analyser (Micromeritics, USA), and the temperature ranged from  $100\text{ }^\circ\text{C}$  to  $700\text{ }^\circ\text{C}$  at a heating rate of  $10\text{ }^\circ\text{C}/\text{min}$  under a  $\text{N}_2$  atmosphere. The desorbed ammonia gas was monitored on-line by thermal conductivity (TCD). Moreover, the desorption curve of ammonia gas was plotted. The desorption peaks at the temperature range of  $100\text{-}200\text{ }^\circ\text{C}$ ,  $200\text{-}300\text{ }^\circ\text{C}$  and  $300\text{-}500\text{ }^\circ\text{C}$  corresponded to the desorption of  $\text{NH}_3$  from weak acid sites, medium strong acid sites and strong acid sites, respectively.

Temperature-programmed reduction of hydrogen ( $\text{H}_2$ -TPR) and temperature-programmed desorption of oxygen ( $\text{O}_2$ -TPD) were performed on a Micromeritics Auto Chem II 2920 analyser

instrument (Micromeritics, USA) equipped with a TCD detector. Before the experiments, the catalysts for H<sub>2</sub>-TPR were heated at 200 °C for 2 h, and the catalysts for O<sub>2</sub>-TPD were heated at 300 °C for 2 h in N<sub>2</sub> atmosphere; after that, they were all cooled to 50 °C with N<sub>2</sub> (30 ml/min). Additionally, for H<sub>2</sub>-TPR, the catalyst was reduced from 50 °C to 850 °C at a heating rate of 10 °C/min under 5% H<sub>2</sub>/N<sub>2</sub> (30 ml/min). For O<sub>2</sub>-TPD, the catalyst was treated with 5% O<sub>2</sub>/N<sub>2</sub> (30 ml/min) for 30 min, and then purged by N<sub>2</sub> flow for 30 min to stabilize the baseline. Next, the catalyst is heated by programmed from 50 to 850 °C at a heating rate of 10 °C/min under N<sub>2</sub> flow (30 ml/min). During the O<sub>2</sub>-TPD and H<sub>2</sub>-TPR test, the water vapour produced was condensed in a cold trap filled with liquid nitrogen. The temperature was 77k.

**Table S1**

The area percentages and ratios of Q<sup>3</sup> and Q<sup>4</sup> signal peaks of <sup>29</sup>Si MAS-NMR curves on the prepared samples.

| Samples   | Q <sup>3</sup> (%) | Q <sup>4</sup> (%) | Q <sup>3</sup> /Q <sup>4</sup> ratio |
|-----------|--------------------|--------------------|--------------------------------------|
| Si-HZSM-5 | 3.29               | 96.71              | 0.034                                |
| Fe-HZSM-5 | 8.21               | 91.79              | 0.089                                |
| Co-HZSM-5 | 7.60               | 92.40              | 0.082                                |
| Cr-HZSM-5 | 4.58               | 95.42              | 0.048                                |
| Mn-HZSM-5 | 7.94               | 92.06              | 0.086                                |
| Cu-HZSM-5 | 4.94               | 95.06              | 0.052                                |

**Table S2**

The catalytic activity of some catalysts for DCM.

| Catalysts                                            | Airspeed                            | T <sub>90</sub> | References |
|------------------------------------------------------|-------------------------------------|-----------------|------------|
| HZSM-5                                               | 15000h <sup>-1</sup>                | 350°C           | [1]        |
| 9%Cr/HZSM-5                                          | 15000h <sup>-1</sup>                | 330°C           | [1]        |
| 1%Cr-O/HZSM-5                                        | 15000h <sup>-1</sup>                | 330°C           | [2]        |
| Mn-Co@Z                                              | 30000h <sup>-1</sup>                | 420°C           | [3]        |
| CeO <sub>2</sub> -CrOx-S                             | 15000h <sup>-1</sup>                | 360°C           | [4]        |
| 0.01 Pt/HZSM-5                                       | 15000h <sup>-1</sup>                | 320°C           | [5]        |
| V <sub>4</sub> /TiO <sub>2</sub>                     | 12000ml/g·h                         | >400°C          | [6]        |
| Mn <sub>4</sub> /TiO <sub>2</sub>                    | 12000ml/g·h                         | >400°C          | [6]        |
| Pd <sub>0.12</sub> Mn <sub>4</sub> /TiO <sub>2</sub> | 12000ml/g·h                         | >400°C          | [6]        |
| HZSM-5                                               | 40000ml/g·h (80000h <sup>-1</sup> ) | (>500°C)        | This work  |
| 0.5%Cr-HZSM-5                                        | 40000ml/g·h (80000h <sup>-1</sup> ) | 405°C           | This work  |
| 0.5%Mn-HZSM-5                                        | 40000ml/g·h (80000h <sup>-1</sup> ) | 360°C           | This work  |

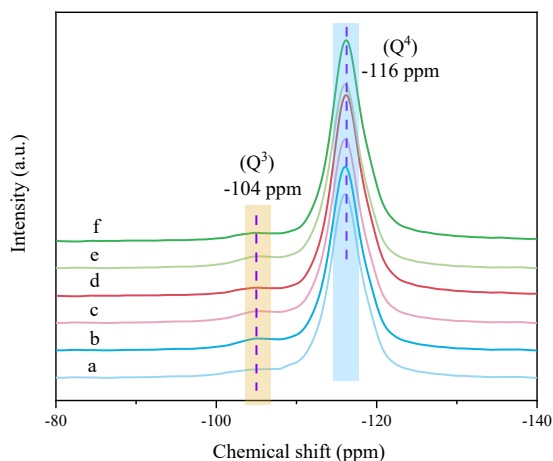

**Fig. S1.** The  $^{29}\text{Si}$  MAS-NMR spectra of (a) Si-HZ, (b) Fe-HZ, (c) Co-HZ, (d) Cr-HZ, (e) Mn-HZ, (f) Cu-HZ.

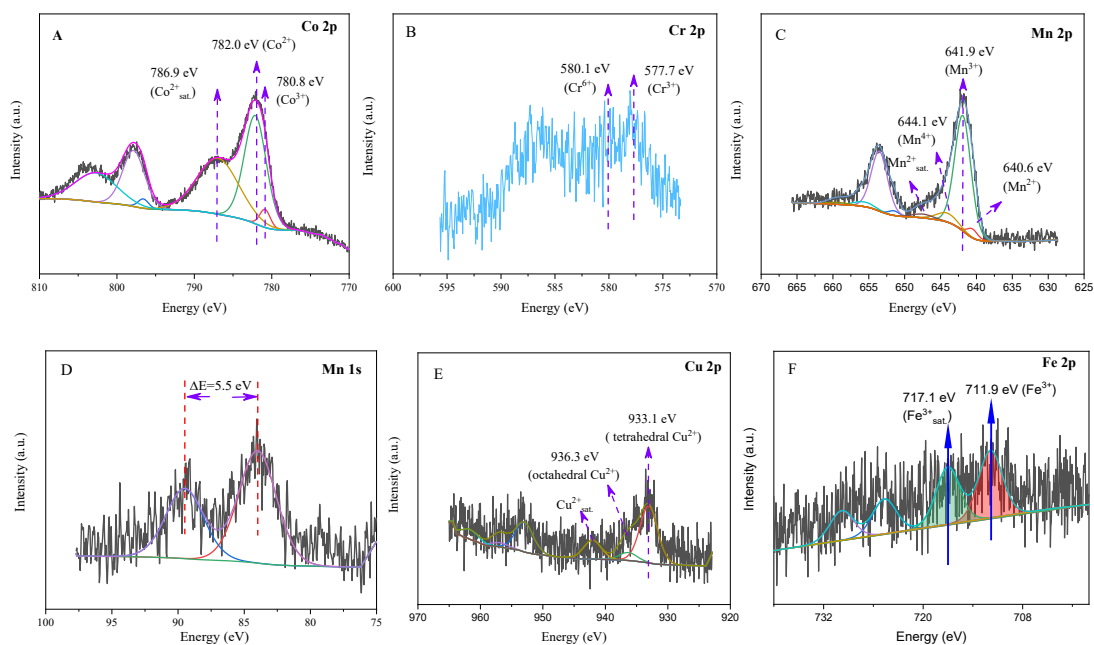

**Fig. S2.** XPS spectra of (A) Co 2p of Co-HZSM-5, (B) Cr 2p of Cr-HZSM-5, (C) Mn 1s of Mn-HZSM-5, (D) Mn 2p of Mn-HZSM-5, (E) Cu 2p of Cu-HZSM-5 and (F) Fe-HZSM-5.

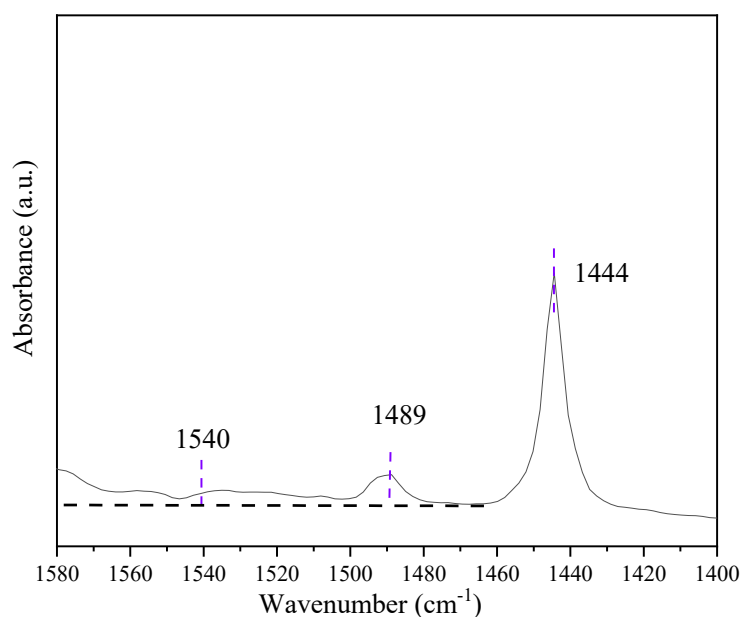

**Fig. S3.** Py-IR profiles of Si-HZSM-5.

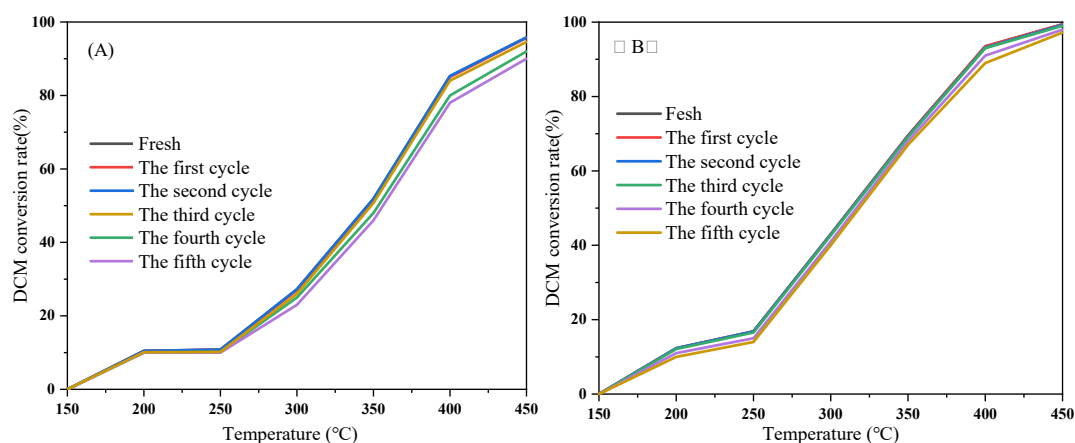

**Fig. S4.** The reuse catalytic performance of (A) Cr-HZSM-5 and (B) Mn-HZSM-5.

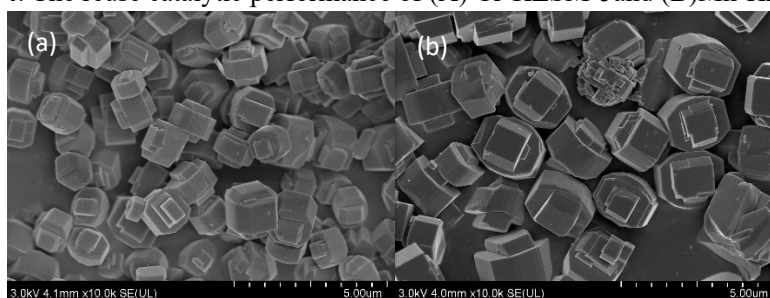

**Fig. S5.** The SEM of Cr-ZSM-5 (a) before and (b) after the reuse studies.

### References

- [1] Yang P., Xue X. & Meng Z. et al. Enhanced catalytic activity and stability of Ce doping on Cr supported HZSM-5 catalysts for deep oxidation of chlorinated volatile organic compounds[J]. Chemical Engineering Journal, Vol.234(2013), pp.203-210.
- [2] Su J , Yao W , Liu Y ,et al.The impact of CrOx loading on reaction behaviors of dichloromethane (DCM) catalytic combustion over Cr-O/HZSM-5 catalysts[J].Applied

- Surface Science, 2017, 396(PT.1):1026-1033.DOI:10.1016/j.apsusc.2016.11.083.Fei X, Ouyang W, Gu Z, et al. Effect of Cr doping in promoting the catalytic oxidation of dichloromethane ( $\text{CH}_2\text{Cl}_2$ ) over Cr-Co@Z catalysts[J]. Journal of Hazardous Materials. 2021, 413: 125327.
- [3] Yang P, Meng Z, Yang S, et al. Highly active behaviors of  $\text{CeO}_2\text{-CrO}_x$  mixed oxide catalysts in deep oxidation of 1,2-dichloroethane[J]. Journal of Molecular Catalysis A Chemical, 2014, 393:75-83
- [4] Su Y, Fu K, Zheng Y, et al. Catalytic oxidation of dichloromethane over Pt-Co/HZSM-5 catalyst: Synergistic effect of single-atom Pt,  $\text{Co}_3\text{O}_4$ , and HZSM-5[J]. Applied Catalysis B: Environmental. 2021, 288: 119980.
- [5] Wang L, Li G, Wu P, et al. Promoting effect of Pd modification on the M/TiO<sub>2</sub> (M=V, Ce, Mn) catalyst for catalytic oxidation of dichloromethane(DCM)[J]. Chemical Engineering Science, 2021:116405
